# Supplementary material
Source: MDPI journal article supplement (https://www.mdpi.com/2072-4292/11/7/815)
Supplement: s1 [file s1]

# Supplementary Materials: Alternative Vegetation States in Tropical Forests and Savannas: The Search for Consistent Signals in Diverse Remote Sensing Data. *Remote Sensing* 2019, 4, remotesensing-443856

Sanath Sathyachandran Kumar <sup>1,\*</sup>, Niall P. Hanan <sup>1</sup>, Lara Prihodko <sup>2</sup>, Julius Anchang <sup>1</sup>, C. Wade Ross <sup>1</sup>, Wenjie Ji <sup>1</sup> and Brianna M Lind <sup>1</sup>

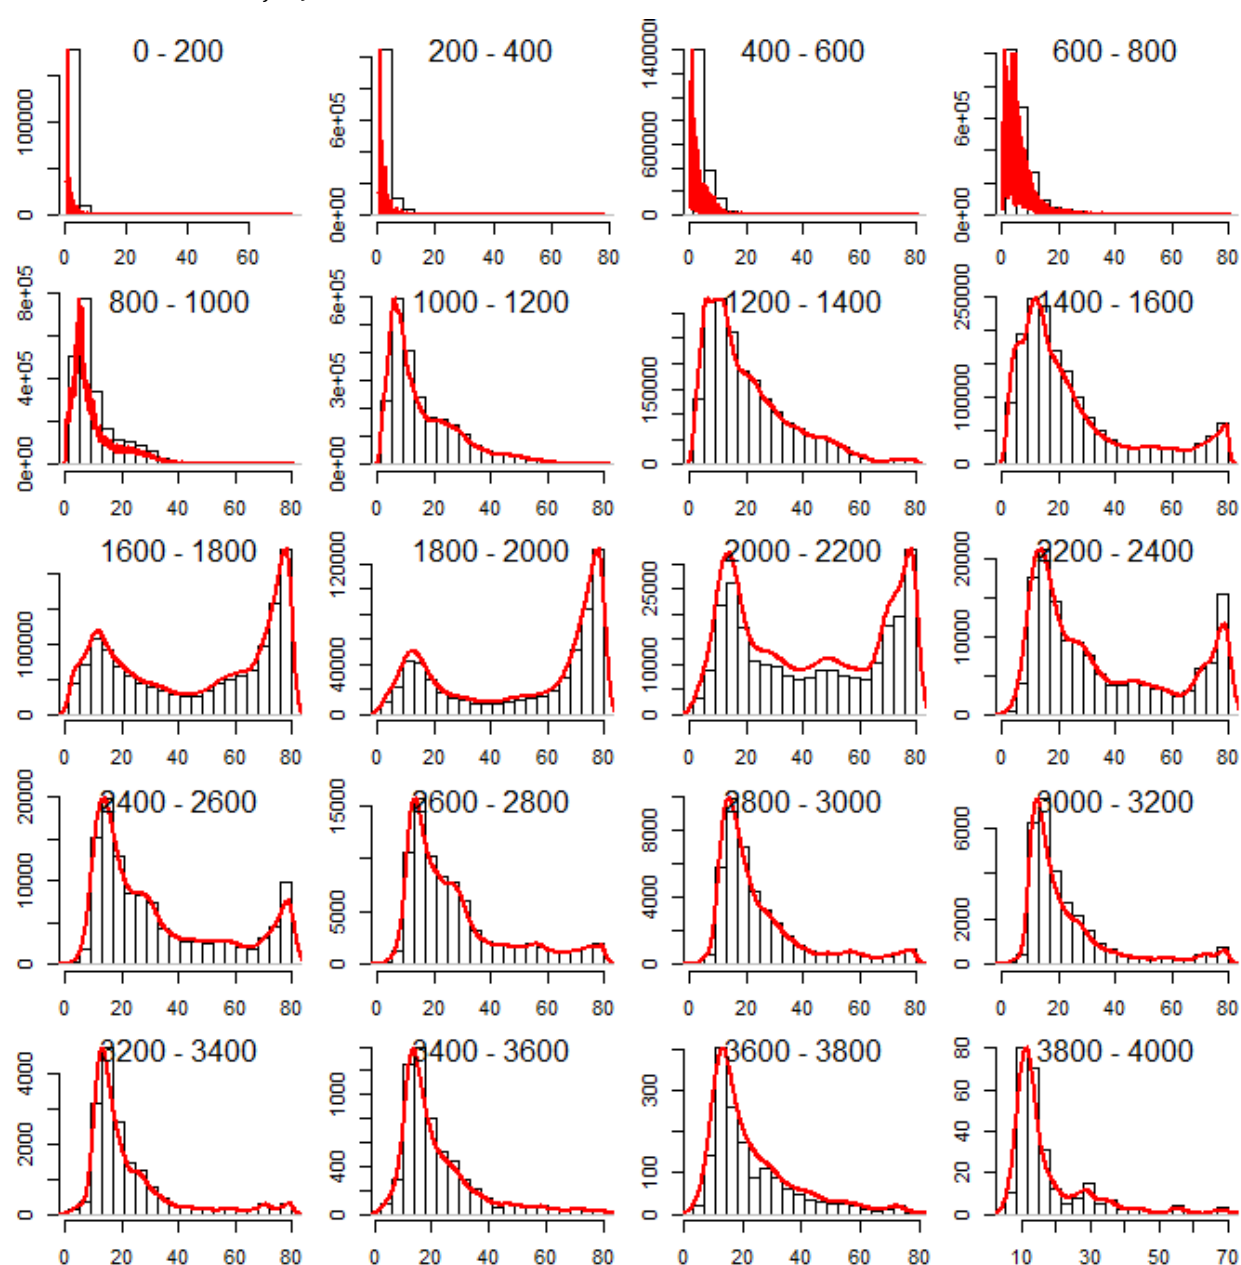

**Figure S1.** Histograms of MODIS tree cover (VCF) over regions stratified by mean annual precipitation (MAP in mm/y). Each histogram was generated using 20 equally spaced bins spanning the range of the data in each region. Red lines trace the kernel density estimates to help visualize the shape of the histograms.

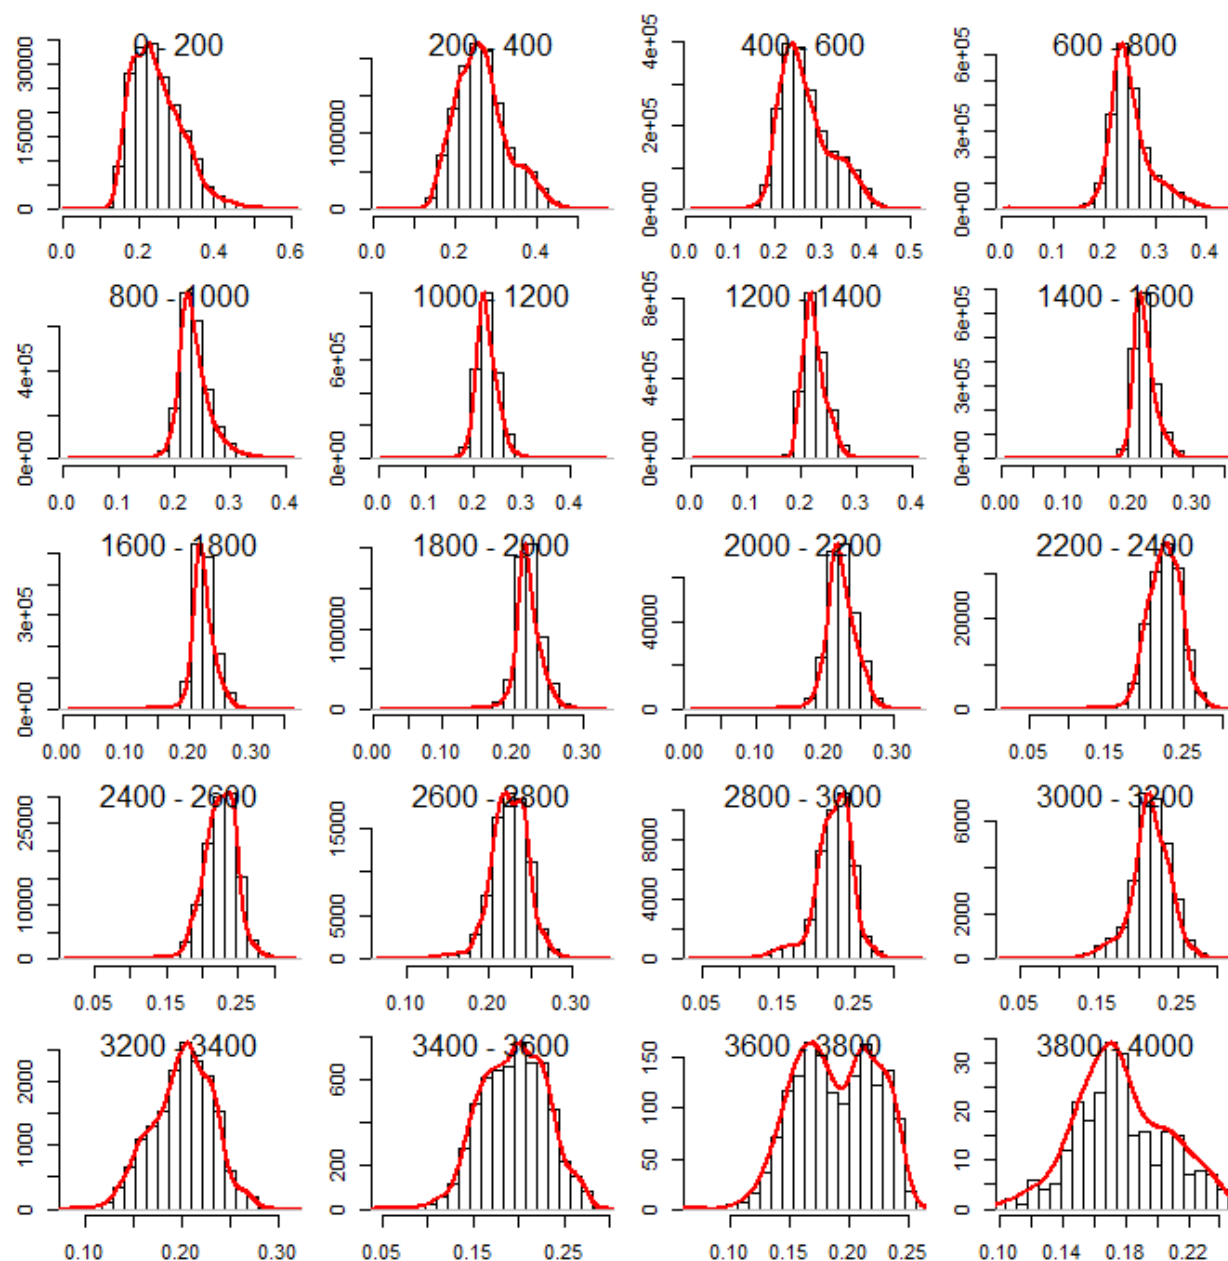

**Figure S2.** Histograms of MODIS NIR albedo over regions stratified by mean annual precipitation (MAP in mm/y). Each histogram was generated using 20 equally spaced bins spanning the range of the data in each region. Red lines trace the kernel density estimates to help visualize the shape of the histograms.

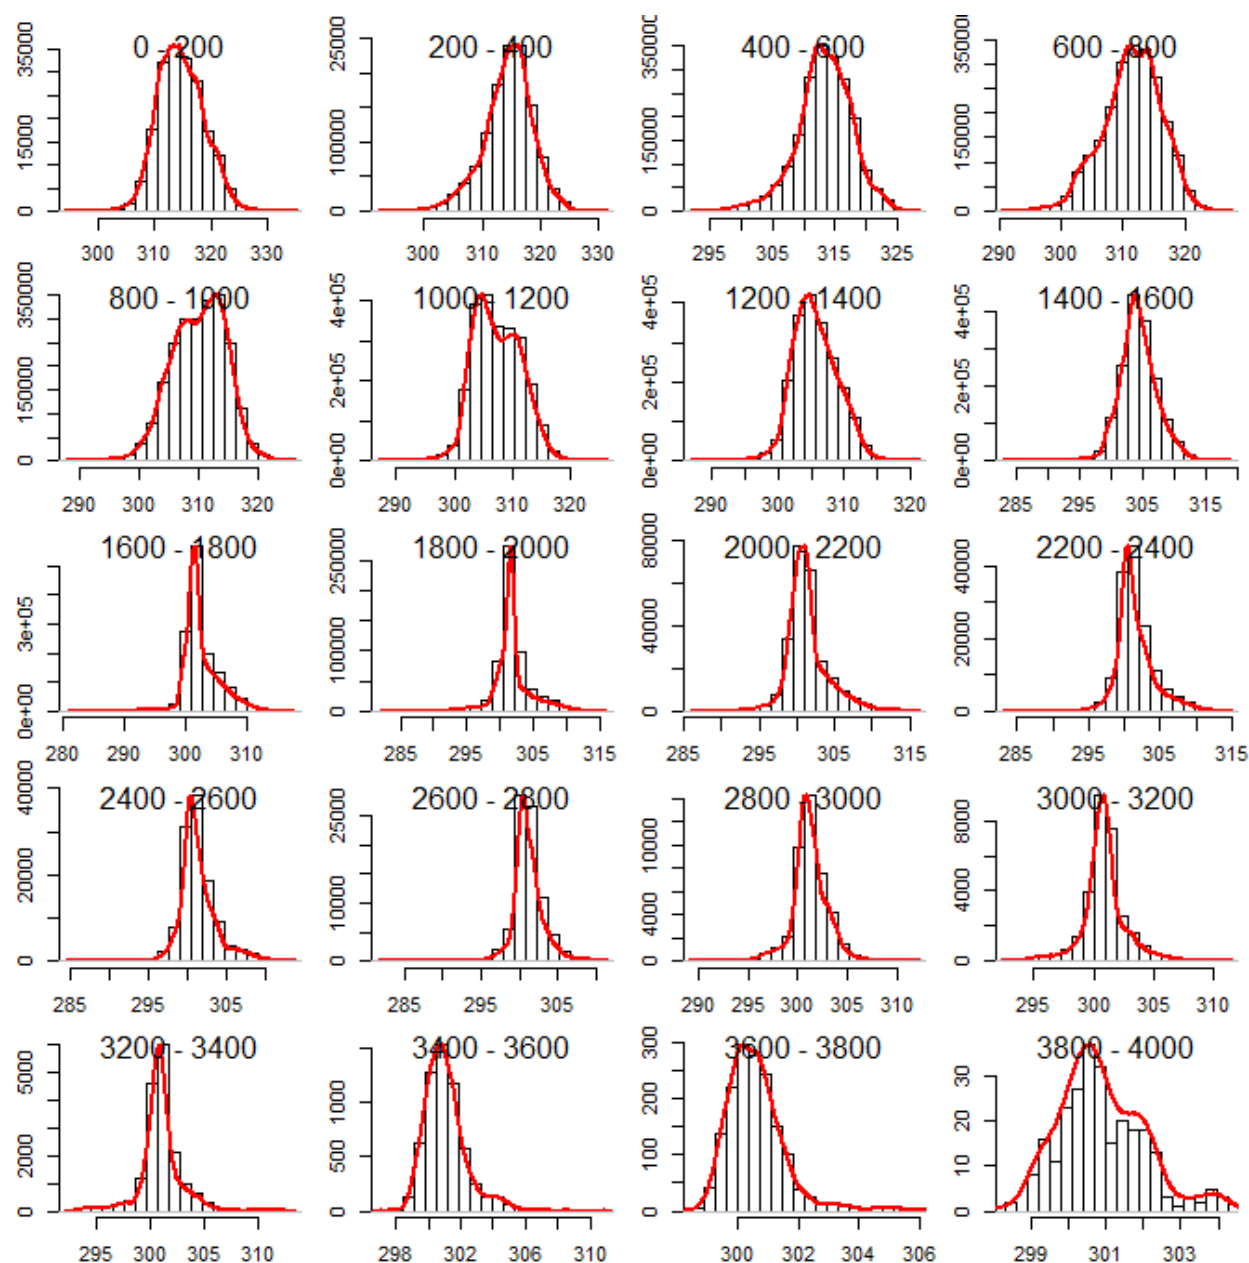

**Figure S3.** Histograms of MODIS Land Surface Temperature over regions stratified by mean annual precipitation (MAP in mm/y). Each histogram was generated using 20 equally spaced bins spanning the range of the data in each region. Red lines trace the kernel density estimates to help visualize the shape of the histograms.

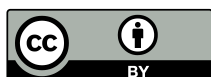

© 2019 by the authors; licensee MDPI, Basel, Switzerland. This article is an open access article distributed under the terms and conditions of the Creative Commons by Attribution (CC-BY) license (<http://creativecommons.org/licenses/by/4.0/>).
